# Supplementary material for: Relative deprivation in income and mortality by leading causes among older Japanese men and women: AGES cohort study
Source: PubMed Central journal article supplement — J Epidemiol Community Health. 2015 Feb 19;69(7):680–5. doi: 10.1136/jech-2014-205103 (PMC4483791; doi:10.1136/jech-2014-205103), 2015-02-19
Supplement: jech-2014-205103-s1.pdf [file jech-2014-205103-s1.pdf]

## Supplemental tables

**Supplementary table 1** Cause-specific mortality rates (per 1000 people per year) by baseline characteristics (N=21,031): AGES cohort , 2003-2007.

|                                          | Men ( N=9,602 ) |        |      |       |                | Women (N=11,429) |        |      |       |                |
|------------------------------------------|-----------------|--------|------|-------|----------------|------------------|--------|------|-------|----------------|
|                                          | n               | Cancer | CVD  | Other | Tobacco cancer | n                | Cancer | CVD  | Other | Tobacco cancer |
| Age group (years)                        |                 |        |      |       |                |                  |        |      |       |                |
| 65-69                                    | 3,349           | 7.8    | 3.9  | 1.1   | 2.4            | 3,477            | 2.3    | 1.7  | 1.0   | 0.3            |
| 70-74                                    | 2,917           | 10.4   | 5.3  | 2.1   | 2.9            | 3,277            | 4.2    | 2.1  | 1.2   | 0.7            |
| 75-79                                    | 2,042           | 16.7   | 10.0 | 6.7   | 4.2            | 2,636            | 5.7    | 4.3  | 2.5   | 1.3            |
| 80+                                      | 1,294           | 24.3   | 19.8 | 13.5  | 5.9            | 2,039            | 10.5   | 14.9 | 9.9   | 1.3            |
| Marital status                           |                 |        |      |       |                |                  |        |      |       |                |
| Married                                  | 8,472           | 12.0   | 6.3  | 3.8   | 3.1            | 6,175            | 3.7    | 3.2  | 1.6   | 0.6            |
| Widowed/separated                        | 1,069           | 15.9   | 15.8 | 5.4   | 5.6            | 4,922            | 6.4    | 6.4  | 4.7   | 0.9            |
| Never married                            | 61              | 5.4    | 20.6 | 4.5   | 0.9            | 333              | 8.0    | 5.5  | 2.3   | 3.4            |
| Educational attainment                   |                 |        |      |       |                |                  |        |      |       |                |
| 9 years or less                          | 5,583           | 13.4   | 8.5  | 4.6   | 3.5            | 7,150            | 5.1    | 5.2  | 3.2   | 0.8            |
| 10+ years                                | 4,019           | 11.0   | 5.9  | 3.1   | 3.1            | 4,279            | 4.7    | 3.5  | 2.4   | 0.8            |
| Type of housing                          |                 |        |      |       |                |                  |        |      |       |                |
| Own home                                 | 8,990           | 12.4   | 7.3  | 4.0   | 3.3            | 10,492           | 4.9    | 4.7  | 2.8   | 0.8            |
| Rent housing                             | 334             | 6.8    | 9.0  | 3.3   | 3.6            | 542              | 5.0    | 4.0  | 4.5   | 1.3            |
| Public or company housing                | 163             | 13.3   | 12.2 | 7.4   | 5.5            | 261              | 4.7    | 2.2  | 3.3   | 0.0            |
| Other housing                            | 115             | 22.7   | 7.6  | 0.0   | 2.5            | 134              | 12.3   | 2.0  | 6.1   | 2.0            |
| Medical care need                        |                 |        |      |       |                |                  |        |      |       |                |
| No                                       | 2,746           | 9.7    | 4.6  | 2.6   | 2.4            | 2,688            | 3.5    | 3.3  | 2.6   | 0.6            |
| Yes, but not utilized by personal choice | 779             | 12.0   | 5.3  | 4.1   | 2.5            | 1,072            | 4.2    | 3.3  | 1.2   | 1.0            |
| Yes, currently                           | 6,077           | 13.7   | 9.1  | 4.7   | 3.9            | 7,669            | 5.6    | 5.3  | 3.2   | 0.8            |
| Smoking                                  |                 |        |      |       |                |                  |        |      |       |                |
| Never                                    | 2,878           | 8.9    | 6.4  | 4.3   | 1.4            | 10,527           | 4.7    | 4.5  | 2.8   | 0.6            |
| Ex                                       | 4,541           | 12.2   | 7.2  | 3.8   | 3.4            | 620              | 5.8    | 6.7  | 4.3   | 2.0            |
| Current                                  | 2,183           | 17.2   | 9.2  | 4.1   | 5.7            | 283              | 14.5   | 3.9  | 3.9   | 6.8            |
| Alcohol consumption                      |                 |        |      |       |                |                  |        |      |       |                |
| None                                     | 4,037           | 15.7   | 10.5 | 4.9   | 4.3            | 9,776            | 5.2    | 4.9  | 3.0   | 0.7            |
| Less than 270ml /day                     | 4,674           | 9.9    | 5.5  | 3.3   | 2.6            | 1,615            | 3.5    | 2.8  | 2.2   | 1.1            |

|                                 |       |      |      |     |     |       |     |     |     |     |
|---------------------------------|-------|------|------|-----|-----|-------|-----|-----|-----|-----|
| 270ml or more/day               | 891   | 10.2 | 3.7  | 3.7 | 2.7 | 38    | 0.0 | 0.0 | 7.7 | 0.0 |
| Time of walking a day           |       |      |      |     |     |       |     |     |     |     |
| Less than 30 minutes            | 3,502 | 15.9 | 10.4 | 5.5 | 4.6 | 4,454 | 5.7 | 5.8 | 3.9 | 1.2 |
| 30-60 minutes                   | 3,439 | 11.3 | 7.4  | 3.5 | 2.8 | 3,983 | 4.7 | 4.3 | 2.4 | 0.7 |
| 60-90 minutes                   | 1,451 | 9.4  | 4.0  | 3.0 | 1.8 | 1,631 | 4.3 | 3.0 | 2.1 | 0.3 |
| 90 or more minutes              | 1,210 | 9.4  | 3.5  | 2.4 | 3.1 | 1,360 | 4.0 | 3.5 | 2.2 | 0.4 |
| Health checkups                 |       |      |      |     |     |       |     |     |     |     |
| Yes, in the last 2-3 years      | 6,073 | 10.9 | 6.0  | 2.6 | 3.1 | 7,461 | 4.3 | 3.6 | 2.1 | 0.7 |
| Yes, 4 years ago or before      | 1,547 | 14.9 | 10.4 | 6.4 | 4.0 | 1,327 | 5.3 | 5.7 | 2.7 | 0.7 |
| Never                           | 1,983 | 15.2 | 9.9  | 6.8 | 3.6 | 2,642 | 6.8 | 7.1 | 5.2 | 1.0 |
| Depressive symptoms (GDS score) |       |      |      |     |     |       |     |     |     |     |
| None ( $\leq 5$ )               | 6,760 | 10.4 | 5.5  | 2.5 | 2.9 | 7,682 | 4.1 | 3.7 | 2.2 | 0.8 |
| Mild-Moderate (6-10)            | 2,343 | 16.5 | 11.8 | 7.4 | 5.0 | 3,116 | 6.6 | 6.3 | 4.3 | 0.8 |
| Severe (11+)                    | 499   | 22.7 | 14.5 | 9.8 | 2.4 | 631   | 7.4 | 7.7 | 5.4 | 1.0 |

CVD, cardiovascular diseases, Tobacco cancer, tobacco-related cancers (cancers of lip, oral cavity, pharynx, trachea, tracheal branch, and lung).

**Supplementary table 2.** Hazard ratios (95% confidence intervals) for cardiovascular mortality among men: AGES cohort data 2003-2007.

|                                                   | Univariate |             | Sociodemographics adjusted |             | Fully adjusted |             |
|---------------------------------------------------|------------|-------------|----------------------------|-------------|----------------|-------------|
| Relative deprivation defined by:                  |            |             |                            |             |                |             |
| (1)sex and municipality of residence*             | 1.23       | (1.09-1.38) | 1.54                       | (1.11-2.13) | 1.45           | (1.04-2.03) |
| (2)sex and age groups*                            | 1.19       | (1.06-1.34) | 1.60                       | (1.03-2.48) | 1.54           | (0.98-2.42) |
| (3)sex, age group, and municipality of residence* | 1.19       | (1.06-1.34) | 1.50                       | (1.09-2.08) | 1.42           | (1.02-1.98) |
| Household equivalized income*                     | 0.82       | (0.70-0.94) |                            |             |                |             |
| Age group (years)                                 |            |             |                            |             |                |             |
| 65-69                                             | 1          | ref.        | 1                          | ref.        | 1              | ref.        |
| 70-74                                             | 1.37       | (0.94-1.99) | 1.28                       | (0.88-1.87) | 1.21           | (0.83-1.77) |
| 75-79                                             | 2.61       | (1.82-3.73) | 2.30                       | (1.60-3.30) | 2.06           | (1.43-2.97) |
| 80+                                               | 5.24       | (3.70-7.43) | 4.24                       | (2.95-6.09) | 3.78           | (2.61-5.46) |
| Marital status                                    |            |             |                            |             |                |             |
| Married                                           | 1          | ref.        | 1                          | ref.        | 1              | ref.        |
| Widowed/separated                                 | 2.50       | (1.86-3.36) | 1.90                       | (1.39-2.58) | 1.71           | (1.25-2.33) |
| Never married                                     | 3.24       | (1.24-8.49) | 3.12                       | (1.18-8.23) | 2.89           | (1.10-7.57) |
| Educational attainment                            |            |             |                            |             |                |             |
| 9 years or less                                   | 1          | ref.        | 1                          | ref.        | 1              | ref.        |
| 10+ years                                         | 0.69       | (0.53-0.91) | 0.87                       | (0.65-1.15) | 0.88           | (0.66-1.17) |
| Type of housing                                   |            |             |                            |             |                |             |
| Own home                                          | 1          | ref.        | 1                          | ref.        | 1              | ref.        |
| Rent housing                                      | 1.22       | (0.58-2.55) | 1.08                       | (0.49-2.36) | 0.96           | (0.44-2.08) |
| Public or company housing                         | 1.68       | (0.76-3.71) | 1.61                       | (0.72-3.63) | 1.50           | (0.68-3.32) |
| Other housing                                     | 1.04       | (0.33-3.24) | 0.69                       | (0.22-2.18) | 0.62           | (0.20-1.96) |
| Medical care need                                 |            |             |                            |             |                |             |
| No                                                | 1          | ref.        | 1                          | ref.        | 1              | ref.        |
| Yes, but not utilized by personal choice          | 1.16       | (0.64-2.11) | 1.02                       | (0.56-1.85) | 0.93           | (0.51-1.70) |
| Yes, currently                                    | 1.97       | (1.41-2.76) | 1.72                       | (1.23-2.41) | 1.55           | (1.09-2.20) |
| Smoking                                           |            |             |                            |             |                |             |
| Never                                             | 1          | ref.        |                            |             | 1              | ref.        |
| Ex                                                | 1.13       | (0.81-1.57) |                            |             | 1.21           | (0.86-1.68) |
| Current                                           | 1.44       | (1.03-2.01) |                            |             | 1.73           | (1.23-2.43) |
| Alcohol consumption                               |            |             |                            |             |                |             |
| None                                              | 1          | ref.        |                            |             | 1              | ref.        |
| Less than 270ml/day                               | 0.52       | (0.40-0.67) |                            |             | 0.64           | (0.49-0.83) |
| 270ml or more/day                                 | 0.35       | (0.19-0.64) |                            |             | 0.45           | (0.25-0.84) |
| Time of walking a day                             |            |             |                            |             |                |             |
| Less than 30 minutes                              | 2.96       | (1.70-5.17) |                            |             | 2.10           | (1.19-3.69) |
| 30-60 minutes                                     | 2.10       | (1.20-3.67) |                            |             | 1.79           | (1.01-3.16) |
| 60-90 minutes                                     | 1.14       | (0.56-2.31) |                            |             | 1.02           | (0.50-2.09) |
| 90 or more minutes                                | 1          | ref.        |                            |             | 1              | ref.        |
| Health checkups                                   |            |             |                            |             |                |             |
| Yes, in the last 2-3 years                        | 1          | ref.        |                            |             | 1              | ref.        |
| Yes, 4 years ago or before                        | 1.66       | (1.24-2.24) |                            |             | 1.12           | (0.83-1.53) |
| Never                                             | 1.74       | (1.21-2.49) |                            |             | 1.33           | (0.91-1.93) |
| Depressive symptoms (GDS score)                   |            |             |                            |             |                |             |
| None ( $\leq 5$ )                                 | 1          | ref.        |                            |             | 1              | ref.        |

|                      |                  |                  |
|----------------------|------------------|------------------|
| Mild-Moderate (6-10) | 2.15 (1.62-2.84) | 1.53 (1.13-2.05) |
| Severe (11+)         | 2.62 (1.59-4.31) | 1.73 (1.01-2.97) |

---

\*per 1 standard deviation unit increase. Estimates for income were not obtained for multivariate models as those models are income-stratified proportional hazard regression. Three values of relative deprivation (1)-(3) were separately modeled with the same set of covariates. Only the hazard ratios of those covariates in the model for (1) were shown here. They were almost identical to the estimates for the covariates in other two models.

**Supplementary table 3** Hazard ratios (95% confidence intervals) for cause specific mortalities, using non-imputed data: AGES cohort data 2003-2007.

|                                                   | Variables adjusted for:          | Men                 |                     |                     |
|---------------------------------------------------|----------------------------------|---------------------|---------------------|---------------------|
|                                                   |                                  | Cancer              | CVD                 | All other           |
| <b>MEN</b>                                        |                                  |                     |                     |                     |
| Relative deprivation defined by:                  |                                  |                     |                     |                     |
| (1)sex and municipality of residence*             | None                             | 1.11 (1.01 to 1.22) | 1.22 (1.08 to 1.39) | 1.07 (0.90 to 1.27) |
| (2)sex and age groups*                            |                                  | 1.09 (0.99 to 1.21) | 1.20 (1.05 to 1.36) | 1.10 (0.92 to 1.31) |
| (3)sex, age group, and municipality of residence* |                                  | 1.09 (0.99 to 1.21) | 1.20 (1.06 to 1.36) | 1.04 (0.87 to 1.24) |
| (1)sex and municipality of residence*             | Demographic + SES                | 1.14 (0.94 to 1.39) | 1.36 (1.06 to 1.75) | 1.06 (0.75 to 1.49) |
| (2)sex and age groups*                            |                                  | 1.13 (0.90 to 1.41) | 1.39 (1.04 to 1.84) | 1.34 (0.92 to 1.95) |
| (3)sex, age group, and municipality of residence* |                                  | 1.12 (0.92 to 1.37) | 1.34 (1.04 to 1.72) | 1.04 (0.73 to 1.47) |
| (1)sex and municipality of residence*             | + health behavior and depression | 1.07 (0.86 to 1.33) | 1.24 (0.94 to 1.62) | 0.99 (0.67 to 1.45) |
| (2)sex and age groups*                            |                                  | 1.05 (0.83 to 1.34) | 1.25 (0.92 to 1.70) | 1.32 (0.87 to 2.01) |
| (3)sex, age group, and municipality of residence* |                                  | 1.05 (0.85 to 1.30) | 1.21 (0.92 to 1.59) | 0.96 (0.65 to 1.40) |
| <b>WOMEN</b>                                      |                                  |                     |                     |                     |
| (1)sex and municipality of residence*             | None                             | 1.13 (0.96 to 1.32) | 1.13 (0.94 to 1.35) | 0.83 (0.62 to 1.12) |
| (2)sex and age groups*                            |                                  | 1.13 (0.96 to 1.33) | 1.14 (0.94 to 1.37) | 0.84 (0.62 to 1.13) |
| (3)sex, age group, and municipality of residence* |                                  | 1.13 (0.97 to 1.33) | 1.15 (0.96 to 1.38) | 0.88 (0.66 to 1.17) |
| (1)sex and municipality of residence*             | Demographic + SES                | 1.25 (0.90 to 1.74) | 1.18 (0.81 to 1.71) | 0.96 (0.54 to 1.70) |
| (2)sex and age groups*                            |                                  | 1.27 (0.86 to 1.88) | 1.22 (0.79 to 1.90) | 0.87 (0.44 to 1.70) |
| (3)sex, age group, and municipality of residence* |                                  | 1.20 (0.86 to 1.65) | 1.13 (0.79 to 1.63) | 0.98 (0.56 to 1.70) |
| (1)sex and municipality of residence*             | + health behavior and depression | 1.22 (0.86 to 1.74) | 1.05 (0.71 to 1.57) | 0.92 (0.49 to 1.73) |
| (2)sex and age groups*                            |                                  | 1.21 (0.79 to 1.85) | 1.10 (0.69 to 1.75) | 0.76 (0.36 to 1.59) |
| (3)sex, age group, and municipality of residence* |                                  | 1.14 (0.81 to 1.62) | 1.02 (0.69 to 1.50) | 0.93 (0.50 to 1.71) |
